# Supplementary material for: Molecular structure of gaseous 6-(4-chlorophenyl)-1,5-diazabicyclo[3.1.0]hexane studied by electron diffraction and quantum-chemical calculations
Source: Research Square preprint supplement (doi:10.21203/rs.3.rs-7344972/v1), 2025-08-22
Supplement: Supplementary file 1 [file d366c4cbc0645791917c571b.docx]

*Online Supplementary Materials*

**Electronic Supplementary Materials (ESM) for**

**Molecular structure of gaseous 6-(4-chlorophenyl)-1,5-diazabicyclo[3.1.0]hexane studied by electron diffraction and quantum-chemical calculations**

Alexander V.Belyakov, Vladimir V. Kuznetsov, Nadezhda S. Kormil'tsyna,
 Anatoly N. Rykov, Andrey. S. Dmitrenok, Konstantin L.Tokarev and Igor F. Shishkov.

**S1. Synthetic procedures**

- 1. **General remarks:** All starting materials were purchased from commercial sources. NMR spectra were recorded on Bruker Avance 600 spectrometer at room temperature; the chemical shifts δ were measured in ppm with respect to solvent (CDCl3: 1Н: δ = 7.26 ppm, 13C: δ = 77.0 ppm). Splitting patterns are designated as s, singlet; m, multiplet. The structures of synthesized compounds were elucidated with the aid of 1D NMR (1H, 13C) and 2D NMR (HSQC and HMBC 1H-13C, NOESY 1H-1H, COSY 1H-1H) spectroscopies. The IR spectra were recorded on Bruker “Alpha” spectrometers in the range 400-4000 cm-1 (resolution 2 cm-1). High resolution mass spectra were recorded on a Bruker microTOF-QTM spectrometer with electrospray ionization (ESI). All measurements were performed in a positive (+MS) ion mode (interface capillary voltage: 4500 V) with scan range m/z: 50-3000. External calibration of the mass spectrometer was performed with Electrospray Calibrant Solution (Fluka). A direct syringe injection was used for all analyzed solutions in MeCN (flow rate: 3 μL min-1). Mass spectra were also measured using a Finnigan MAT INCOS-50 instrument. Melting points (mp) were determined using Electrothermal 9100 and SMP-20 capillary melting point apparatus. Analytical thin-layer chromatography (TLC) was carried out using Silufol UV 254. The visualization of the TLC plates was done by spraying of the plates with 5% alcoholic solution of diphenylamine followed by heating of plates.

Diaziridin was synthesized at the N. D. Zelinsky Institute of Organic Chemistry of the Russian Academy of Sciences.

- 1. **General synthetic procedures.**

The synthesis of 6-(4-chlorophenyl)-1,5-diazabicyclo[3.1.0]hexane Cl-DABH was carried out based on cascade reactions of 1,3-diaminopropane (DAP): halogenation/condensation/cyclization[1]. This cascade process included halogenation of DAP with ButOCl in MeOH, condensation of formed mono-*N*-chloroderivative Ⅰ with carbonyl compound and intramolecular cyclization of intermediate α-aminoalсoholes ⅠⅠvia *N-*chlorodiazacyclohexanes ⅠⅠⅠinto target Cl-DABH. Another equivalent ofDAP was used as a base (Scheme 1).

**Scheme 1**

A solution of t-BuOCl (4.5 mL, C = 8.9 mmol/mL, 40.0 mmol) was added dropwise to a solution of propane-1,3-diamine (6.7 mL, 80 mmol) in MeOH (80 mL) at a temperature from –5 to 0 ºC and stirred and then a solution of 4-chlorobenzaldehyde (40.0 mmol, 5.6 g) in MeOH (20 mL). The reaction mixture was stirred for 12 h at 0–5 ºС. The solvent was evaporated under reduced pressure and CHCl3 (80 mL) was added to the residue. The precipitate was filtered off, the solution was washed with water (80 mL), dried with K2CO3. The solvent was evaporated in vacuum and the residue was recrystallized from ethoxyethane.

Yield 4.38 g (56.3%), colorless solid, mp = 103–105 °C (ethoxyethane), (103–105 °C [1], 104–105 °C [2]) R*f* = 0.38 (CHCl3 : MeOH; 20:1).

1H NMR (CDCl3, 600.13 MHz): *δ* = 1.81−1.95 (m, 2 H, H2C(3)), 3.07 (s, 1 H, HC(6)), 3.10−3.16 (m, 2 H, H*a*C(2), H*a*C(4)), 3.57−3.60 (m, 2 H, H*b*C(2), H*b*C(4)), 7.26-7.31 (m 4 H, HC(8), HC(9), HC(12), HC(13). 13С NMR (CDCl3, 150.90 MHz): δ = 21.61 C(3), 52.19 C(2), C(4), 55.90 C(6), 128.40 C(9), C(12), 128.61 C(8), C(13), 134.29 C(10), 135.66 C(7). IR (KBr): ν = 3050, 3023, 2984, 2967, 2939, 2871, 1494, 1464, 1428, 1402, 1381, 1354, 1332, 1289, 1248, 1188, 1174, 1102, 1083, 1015, 971, 957, 872, 843, 824, 800, 700, 632, 516, 466 cm–1. HRMS (ESI-TOF): (1 isotope of chlorine) m/z calcd. for C10H1135ClN2+: 195.0684 [M+H]+; found: 195.0688; (2 isotope of chlorine) m/z calcd. for C10H1136ClN2+: 196.0617 [M+H]+; found: 196.0720; (3 isotope of chlorine) m/z calcd. for C10H1137ClN2+: 197.0654 [M+H]+; found: 197.0660; (4 isotope of chlorine) m/z calcd. for C10H1138ClN2+: 198.0687 [M+H]+; found: 198.1094. Mass-spectra (EI, 70 eV), (3 isotope of chlorine) m/z for C10H1137ClN2+: 196 (5) [М]+, 168 (1) [М – (-СН2-)2]+, 140 (6) [М – (-СН2-)3 – N]+, 113 (2) [М – ]+; (2 isotope of chlorine) m/z for C10H1136ClN2+: 195 (33) [М]+, 167 (8) [М – (-СН2-)2]+, 139 (5) [М – (-СН2-)3 – N]+, 112 (1) [М – ]+; (1 isotope of chlorine) m/z for C10H1135ClN2+: 194 (18) [М]+, 193 (100) [М – Н]+, 166 (2) [М – (-СН2-)2]+, 152(2) [М – (-СН2-)3]+, 138 (15) [М – (-СН2-)3 – N]+, 111 (13) [М – ]+;

**S1.3. Copies of NMR, IR, HRMS end MS spectrum.**

**Fig. S1**. 1H NMR spectrum*6-(4-chlorophenyl)-1,5-diazabicyclo[3.1.0]hexane* (CDCl3).

**Fig. S2**. Fragment 1 of the1H NMR spectrum of *1-(4-chlorophenyl)-1,5-diazabicyclo[3.1.0]hexane* (CDCl3).

**Fig. S3**. Fragment 2 of the1H NMR spectrum of *1-(4-chlorophenyl)-1,5-diazabicyclo[3.1.0]hexane* (CDCl3).

**Fig. S4**.13C NMR spectrum of *6-(4-chlorophenyl)-1,5-diazabicyclo[3.1.0]hexane* (CDCl3).

**Fig. S5.** {1H-13C}HSQС spectrum of *6-(4-chlorophenyl)-1,5-diazabicyclo[3.1.0]hexane* (CDCl3).

**Fig. S6.** {1H-13C}HMBC spectrum of *6-(4-chlorophenyl)-1,5-diazabicyclo[3.1.0]hexane* (CDCl3).

**Fig. S7.** {1H–1H}gNOESYspectrum of *6-(4-chlorophenyl)-1,5-diazabicyclo[3.1.0]hexane* (CDCl3).

**Fig. S8.** {1H–1H}COSYspectrum of *6-(4-chlorophenyl)-1,5-diazabicyclo[3.1.0]hexane* (CDCl3).

**Fig. S9.** IR-spectrum of *6-(4-chlorophenyl)-1,5-diazabicyclo[3.1.0]hexane* (KBr).

**Fig. S10.** HRMS spectrum of *6-(4-chlorophenyl)-1,5-diazabicyclo[3.1.0]hexane*.

**Fig. S11.** MS spectrum of *6-(4-chlorophenyl)-1,5-diazabicyclo[3.1.0]hexane*.

**S1.4. The data of the 2D NMR spectra.**

The data of the heteronuclear correlation NMR spectra {1H-13C}HSQC and {1H-13C}HMBC are presented in Table 1. These spectra show how far away each proton was found from a particular carbon atom, respectively, through one or 2-3 bonds. The 2D NMR spectrum {1H-1H}gNOESY and {1H- 1H}gROESY shows the spatial arrangement of protons relative to each other (Table 2). The mixing time in the NOESY spectrum was 0.7 s.

**Fig. S12**. Molecular model of *6-(4-chlorophenyl)-1,5-diazabicyclo[3.1.0]hexane* with atom numbering.

**Table 1**.The {1H-13C}HSQC, and {1H-13C}HMBC data for *6-(4-chlorophenyl)-1,5-diazabicyclo[3.1.0]hexane* (Fig. S5, S6). Atom numeration is given in Fig. S12.

| Atom numbers | 13C NMR  chemical shift, ppm | {1H-13C}HSQC  interactions | {1H-13C}HMBC  interactions |
| --- | --- | --- | --- |
| C2 | 52.19 | H14 H15 | H16, H17, H18, H19, H20. |
| C3 | 21.61 | H16 H17 | H14, H15, H18, H19. |
| C4 | 52.19 | H18, H19 | H14, H15, H16, H17, H20. |
| C6 | 55.90 | H20 | H14, H15, H18, H19, H21, H24 |
| C7 | 135.66 | - | H20, H21, H22, H23, H24. |
| С8 | 128.61 | H21 | H20, H22, H24. |
| С9 | 128.40 | H22 | H21, H23 |
| С10 | 134.29 | - | H21, H22, H23, H24. |
| C12 | 128.40 | H23 | H22, H24 |
| C13 | 128.61 | H24 | H20, H21, H23. |

**Table 2**. Partial data {1H‑1Н}gNOESY and {1H-1H}COSY *6-(4-chlorophenyl)-1,5-diazabicyclo[3.1.0]hexane* **5** (Fig. S7, S8). Atom numeration is given in Fig. S12.

| Atom numbers | 1H NMR  chemical shift, ppm | {1H‑1Н}gNOESY  Interactions | {1H‑1Н}COSY  Interactions |
| --- | --- | --- | --- |
| H14 | 3.57−3.60, m | H15, H16 | H15, H16, H17 |
| H15 | 3.10−3.16, m | H14, H17, H20 | H14, H16,H17 |
| H16 | 1.81−1.95, m | H14, H17, H18 | H14, H15, H17, H18,H19 |
| H17 | 1.81−1.95, m | H15, H16, H19, H20 | H14, H15, H16, H18,H19 |
| H18 | 3.57−3.60, m | H16,H19 | H16, H17, H19 |
| H19 | 3.10−3.16, m | H17, H18, H20 | H16, H17, H18 |
| H20 | 3.07, s | H15, H17, H19 | - |

**References**

1. V. V. Kuznetsov, S. A. Kutepov, N. N. Makhova, K. A. Lyssenko and D. E. Dmitriev, "1,5-Diazabicyclo[3.1.0]hexanes and 1,6-diazabicyclo[4.1.0]heptanes: a new method for the synthesis, quantum-chemical calculations, and X-ray diffraction study", *Russ. Chem. Bull., Int.Ed.,* 2003, **52**, № 3, 665-673. DOI: 1066-5285/03/5203-665.

2. A.P. Molchanov, D.I. Sipkin, Yu.B. Koptelov, R.R. Kostikov, "Thermolysis of 6-Aryl-1,5-diazabicyclo[3.1.0]hexanes in the Presence of N-Arylmaleimides", *Russ. J. Org. Chem.* 37 (2001), pp. 841-851, 10.1023/A:1012465732305

**S2. Gas-electron diffraction experiment**

The electron diffraction patterns were recorded in the Moscow State University on the EG-100M apparatus using the *R*3 sector made of brass. The electron wavelength was calibrated against gaseous CCl4. The structural parameters of the CCl4 molecule were taken fromS1. Information about the experimental conditions for all datasets used in the present investigation is given in the Table.

Photo films (TASMA FT-41P) were scanned with the use of Epson Perfection Photo 4870 commercial scanner in the 16-bit/4800-dpi gray scale scanning mode and with the use of VueScan computer programS2. This program enables one to retrieve data directly from the detector without any modifications. The data were processed using a computer program written by A.V.B. as inS3. Preliminarily, the high resolution was reduced by averaging over square regions of pixels as described inS3. With this method, mean transmittances and standard deviations were collected. The latter were used as weights for smoothing the transmittance surface with the use of 2D cubic splinesS4. The calibration of the scanner was carried out against MD100 microdensitometer with the use of 24-bit gray scale optical wedge of IT8 transmissive target on Kodak Ektachrome Professional E100G filmS5. Displacements of the scanner were corrected against a special ruler manufactured by LOMO. After refinement of the center of electron diffraction pattern by the least squares method, the data of scanning were transformed into the total intensity curve taking into account 2D background. The atomic scattering factors were taken fromS6.

**Table S2.1 Experimental conditions of the gas-phase electron diffraction experiment for Cl-DABH**

|  | Cl-DABH | |
| --- | --- | --- |
| LD | SD |
| Camera distance (mm) | 362.3 | 193.9 |
| Nozzle temperature (K) | 363 | 364 |
| Accelerating voltage (kV) | 60 | 60 |
| Vacuum (mm Hg) | 4.0·10–5 | 4.0·10–5 |
| Electron beam current (µA) | 3.0 | 2.8 |
| Electron wavelength (Å) | 0.049948 | 0.050322 |
| Number of films used | 3 | 3 |
| Range of *s* value (Å–1)a | 4.2–16.0 | 13.0–31.8 |

a *s* = (4*π/λ*)sin(*θ/*2), where *θ* is the scattering angle and λ is the electron wavelength. Experimental intensity curves were digitized with a step of 0.2 Å–1.

**References**

S1 S. Shibata, K. Iijima, R. Tani, and I. Nakamura, *Rep.Fac.Sci.,Shizuoka Univ.* 1974, **9**, 33.

S2 E. Hamrick, **2014 (**[**http://hamrick.com**](http://hamrick.com/)**)**.

S3 a) S. Ó. Wallevik, R. Bjornsson, Á. Kvaran, S. Jonsdottir, I. Arnason, A. V. Belyakov, T. Kern, and K. Hassler, *Organometallics* 2013, **32**, 6996; b) A. V. Belyakov, A. A. Baskakov, V. N. Naraev, A. N. Rykov, H. Oberhammer, I. Arnason, and S. O. Wallevik, *Russ. J. Phys. Chem. A (Engl.Transl.)* 2012, **86**, 1563.

S4 P. Dierckx, Curve and Surface Fitting with Splines. Monographs on numerical analysis, Clarendon Press, Oxford; New York, 1993.

S5 P. Karp and A. Kraushaar, Fogra-Report Nr. 23024 LaserSoft Imaging AG, 2009, 1-9 **(**[**http://www.silverfast.com/showdocu/ru.html?docu=1150**](http://www.silverfast.com/showdocu/ru.html?docu=1150)**)**.

S6 A. W. Ross, M. Fink, and R. L. Hilderbrandt, in *International tables for crystallography, Vol. C*, Kluwer Acad. Publ., Dodrecht, 1992, 245.

**S3. Quantum chemical calculations and GED data**

**Table S3.1**. Cartesian coordinates of the molecule Cl-DABH, of *Cs* symmetry, at the MP2/ cc- pVTZ, (MP2), and B3LYP/cc-pVTZ, (DFT,) levels of theory (*r*e, Å)

|  | | MP2 | | | | | | DFT | | | | |
| --- | --- | --- | --- | --- | --- | --- | --- | --- | --- | --- | --- | --- |
| Atom | | *x* | | *y* | | *z* | | *x* | | *y* | | *z* |
| C1 | 1.466380 | | -0.337949 | | 0.000000 | | 1.458212 | | -0.328281 | | 0.000000 | |
| N2 | 2.218362 | | 0.655343 | | -0.753468 | | 2.238758 | | 0.643658 | | -0.747451 | |
| N3 | 2.218362 | | 0.655343 | | 0.753468 | | 2.238758 | | 0.643658 | | 0.747451 | |
| C4 | 3.529792 | | 0.134153 | | 1.188712 | | 3.545038 | | 0.119615 | | 1.198814 | |
| C5 | 3.529792 | | 0.134153 | | -1.188712 | | 3.545038 | | 0.119615 | | -1.198814 | |
| C6 | 4.169921 | | -0.586336 | | 0.000000 | | 4.214458 | | -0.572122 | | 0.000000 | |
| C7 | -0.005234 | | -0.226643 | | 0.000000 | | -0.021812 | | -0.211021 | | 0.000000 | |
| C8 | -0.612667 | | 1.031093 | | 0.000000 | | -0.640662 | | 1.039544 | | 0.000000 | |
| C9 | -1.998057 | | 1.142263 | | 0.000000 | | -2.023064 | | 1.143920 | | 0.000000 | |
| C10 | -2.775683 | | -0.014264 | | 0.000000 | | -2.792975 | | -0.013136 | | 0.000000 | |
| C11 | -2.189470 | | -1.276197 | | 0.000000 | | -2.201767 | | -1.267018 | | 0.000000 | |
| C12 | -0.800630 | | -1.372789 | | 0.000000 | | -0.814689 | | -1.355713 | | 0.000000 | |
| CL13 | -4.505430 | | 0.121441 | | 0.000000 | | -4.541992 | | 0.115493 | | 0.000000 | |
| H14 | 1.851225 | | -1.353920 | | 0.000000 | | 1.816894 | | -1.353921 | | 0.000000 | |
| H15 | 3.384620 | | -0.504931 | | -2.058778 | | 3.394609 | | -0.541146 | | -2.052699 | |
| H16 | 4.121648 | | 0.997523 | | -1.488731 | | 4.126749 | | 0.977741 | | -1.535441 | |
| H17 | 3.938322 | | -1.648097 | | 0.000000 | | 4.027776 | | -1.644699 | | 0.000000 | |
| H18 | 5.252449 | | -0.487342 | | 0.000000 | | 5.293965 | | -0.434548 | | 0.000000 | |
| H19 | 3.384620 | | -0.504931 | | 2.058778 | | 3.394609 | | -0.541146 | | 2.052699 | |
| H20 | 4.121648 | | 0.997523 | | 1.488731 | | 4.126749 | | 0.977741 | | 1.535441 | |
| H21 | 0.012749 | | 1.913068 | | 0.000000 | | -0.027807 | | 1.929035 | | 0.000000 | |
| H22 | -2.478003 | | 2.110527 | | 0.000000 | | -2.504066 | | 2.111010 | | 0.000000 | |
| H23 | -2.811216 | | -2.159914 | | 0.000000 | | -2.814550 | | -2.156242 | | 0.000000 | |
| H24 | -0.334540 | | -2.350742 | | 0.000000 | | -0.349269 | | -2.333664 | | 0.000000 | |

**Table S3.2**. GED Cartesian coordinates of the molecule Cl-DABH, of *Cs* symmetry, (*r*e, Å)

|  | | GED | | | | | |
| --- | --- | --- | --- | --- | --- | --- | --- |
| Atom | | *x* | | *y* | | *z* | |
| C1 | 1.48127 | | 0.00000 | | 0.00000 | |  |
| N2 | 2.12655 | | 1.31130 | | 0.00000 | |  |
| N3 | 2.12655 | | 0.43917 | | 1.23558 | |  |
| C4 | 3.46071 | | -0.20237 | | 1.31026 | |  |
| C5 | 3.46071 | | 1.16682 | | -0.62950 | |  |
| C6 | 4.13155 | | -0.09502 | | -0.06707 | |  |
| C7 | 0.00000 | | 0.00000 | | 0.00000 | |  |
| C8 | -0.69829 | | 0.98475 | | 0.69509 | |  |
| C9 | -2.08440 | | 0.98871 | | 0.69788 | |  |
| C10 | -2.76850 | | 0.00024 | | 0.00017 | |  |
| C11 | -2.08661 | | -0.98719 | | -0.69681 | |  |
| C12 | -0.69818 | | -0.97439 | | -0.68778 | |  |
| CL13 | -4.49870 | | 0.00270 | | 0.00191 | |  |
| H14 | 1.93980 | | -0.80392 | | -0.56745 | |  |
| H15 | 3.33935 | | 1.14025 | | -1.70797 | |  |
| H16 | 4.02273 | | 2.05812 | | -0.36828 | |  |
| H17 | 3.93550 | | -0.96400 | | -0.68753 | |  |
| H18 | 5.20860 | | 0.01848 | | 0.00785 | |  |
| H19 | 3.33935 | | -1.22745 | | 1.64642 | |  |
| H20 | 4.02273 | | 0.34227 | | 2.06261 | |  |
| H21 | -0.13967 | | 1.74037 | | 1.22845 | |  |
| H22 | -2.63579 | | 1.74786 | | 1.23373 | |  |
| H23 | -2.63800 | | -1.74634 | | -1.23266 | |  |
| H24 | -0.15742 | | -1.73863 | | -1.22722 | |  |

**Table S3.3**. Total corrections Δ(*rij*,e – *rij*,a) to internuclear distances *rij*,a, theoretical *uij*,h1 and experimental *uij*,exp rms vibrational amplitudes (Å) for Cl-DABH molecule of the *C*s symmetry

| Type | At.Num. | *r*ij,a | *rij*,e – *rij*,aa | *uij*,h1b | *uij*,exp |
| --- | --- | --- | --- | --- | --- |
| C C | 1 7 | 1.4918 | -0.0105 | 0.0494 | 0.053() |
| N C | 1 2 | 1.4694 | -0.0079 | 0.0517 | 0.056() |
| N N | 2 3 | 1.5219 | -0.0095 | 0.0566 | 0.061() |
| N C | 2 5 | 1.4914 | -0.0091 | 0.0526 | 0.057() |
| C C | 4 6 | 1.5459 | -0.0101 | 0.0534 | 0.057() |
| C C | 7 8 | 1.3990 | -0.0060 | 0.0458 | 0.050() |
| C C | 8 9 | 1.3939 | -0.0078 | 0.0452 | 0.049() |
| C C | 9 10 | 1.3952 | -0.0053 | 0.0457 | 0.050() |
| C C | 10 11 | 1.3946 | -0.0069 | 0.0455 | 0.049() |
| C C | 11 12 | 1.3942 | -0.0057 | 0.0455 | 0.049() |
| C C | 7 12 | 1.3993 | -0.0079 | 0.0455 | 0.049() |
| ClC | 10 13 | 1.7389 | -0.0087 | 0.0507 | 0.055() |
| ClN | 2 13 | 6.7715 | -0.0183 | 0.1317 | 0.286() |
| ClC | 11 13 | 2.7086 | -0.0093 | 0.0664 | 0.071() |
| ClC | 9 13 | 2.7086 | -0.0094 | 0.0665 | 0.071() |
| ClC | 12 13 | 3.9941 | -0.0098 | 0.0654 | 0.098() |
| ClC | 8 13 | 3.9977 | -0.0117 | 0.0655 | 0.098() |
| ClC | 7 13 | 4.5106 | -0.0119 | 0.0656 | 0.115() |
| ClC | 1 13 | 5.9933 | -0.0133 | 0.0723 | 0.264() |
| ClC | 4 13 | 8.0796 | -0.0108 | 0.1431 | 0.292() |
| ClC | 6 13 | 8.6455 | -0.0144 | 0.1045 | 0.289() |
| N C | 2 4 | 2.4193 | -0.0135 | 0.0603 | 0.074() |
| N C | 2 6 | 2.4642 | -0.0142 | 0.0597 | 0.073() |
| N C | 2 7 | 2.5155 | -0.0172 | 0.0718 | 0.085() |
| N C | 2 8 | 2.9786 | -0.0512 | 0.1557 | 0.160() |
| N C | 2 12 | 3.6838 | 0.0144 | 0.1191 | 0.151() |
| N C | 2 9 | 4.3265 | -0.0459 | 0.1424 | 0.192() |
| N C | 2 11 | 4.8445 | 0.0052 | 0.1195 | 0.290() |
| N C | 2 10 | 5.0872 | -0.0196 | 0.1159 | 0.291() |
| C C | 7 12 | 1.3899 | -0.0079 | 0.0455 | 0.049() |
| C C | 10 12 | 2.3972 | -0.0078 | 0.0556 | 0.069() |
| C C | 8 10 | 2.4040 | -0.0086 | 0.0556 | 0.069() |
| C C | 4 5 | 2.3888 | -0.0145 | 0.0646 | 0.078() |
| C C | 8 12 | 2.4066 | -0.0086 | 0.0554 | 0.069() |
| C C | 7 9 | 2.4200 | -0.0098 | 0.0551 | 0.068() |
| C C | 9 11 | 2.4274 | -0.0089 | 0.0552 | 0.069() |
| C C | 7 11 | 2.4214 | -0.0102 | 0.0549 | 0.068() |
| C C | 1 4 | 2.3962 | -0.0138 | 0.0697 | 0.083() |
| C C | 1 12 | 2.4895 | -0.0051 | 0.0664 | 0.080() |
| C C | 1 8 | 2.5106 | -0.0199 | 0.0653 | 0.079() |
| C C | 1 6 | 2.6752 | -0.0224 | 0.0843 | 0.089() |
| C C | 7 10 | 2.7782 | -0.0097 | 0.0618 | 0.067() |
| C C | 9 12 | 2.7830 | -0.0089 | 0.0623 | 0.067() |
| C C | 8 11 | 2.7943 | -0.0098 | 0.0624 | 0.067() |
| C C | 4 7 | 3.7264 | -0.0204 | 0.0795 | 0.112() |
| C C | 1 11 | 3.7759 | -0.0090 | 0.0665 | 0.099() |
| C C | 1 9 | 3.7855 | -0.0201 | 0.0658 | 0.098() |
| C C | 6 7 | 4.1611 | -0.0279 | 0.0895 | 0.122() |
| C C | 1 10 | 4.2636 | -0.0138 | 0.0685 | 0.101() |
| C C | 4 8 | 4.4082 | -0.0396 | 0.1604 | 0.210() |
| C C | 4 12 | 4.6710 | 0.0071 | 0.1570 | 0.206() |
| C C | 6 12 | 4.9616 | -0.0134 | 0.1343 | 0.293() |
| C C | 6 8 | 5.0458 | -0.0384 | 0.1018 | 0.289() |
| C C | 4 9 | 5.7402 | -0.0356 | 0.1501 | 0.294() |
| C C | 4 11 | 5.9479 | 0.0033 | 0.1518 | 0.291() |
| C C | 6 11 | 6.3256 | -0.0123 | 0.1271 | 0.289() |
| C C | 4 10 | 6.3845 | -0.0158 | 0.1227 | 0.286() |
| C C | 6 9 | 6.3895 | -0.0336 | 0.0988 | 0.290() |
| C C | 6 10 | 6.9218 | -0.0208 | 0.1016 | 0.293() |

a Calculated with the B3LYP/cc-pVTZ cubic and quadratic force constants (see text).

b Calculated with the B3LYP/cc-pVTZ quadratic force constants (see text).

**Table S3.4**. Correlation matrix. Parenthesized values in amplitudes (U) are group numbers (see main text)

R(1,7)     100

R(8,7)    -37  100

R(13,10)   -1   19  100

A(2,1,7)   -53    5   33  100

A(4,3,2)    -6   -7    4  -19  100

D(4,3,2)  -26  -46  -10   14   23  100

U(2)       -38   51   30   29   -8  -12  100

U(1)        29   13   -7  -28    3  -25    9  100

U(10)        0   -1   -7   -8    1    0   -1    1  100

U(4)        24  -12   24  -23   21  -17    9   15    1  100

U(6)         7  -13    1   22  -18   17    6   -3   -6  -11  100

U(7)       -15   15    2   27  -20  -14   12   -1    6   -8   10  100

U(9)        -9    8    8   16   -2   -4    7   -2   56   -2    7   -5  100

U(11)        0   -2    0    0    0    2    2   -1    2    0   -3    8   -8  100

U(8)         5    0  -11  -22   17   -2   -6    6   15    8  -24   42  -21   16  100

U(3)       -15    5    0  -32   85   19   17    9    3   34  -21  -21   -3    1   17  100

U(5)         7  -21   -1  -12   36   27   -3    4    2   20    2   -7   -4    2   10   31  100
